# Supplementary material
Source: PubMed Central journal article supplement (PMC9797349)
Supplement: NIHMS1838546-supplement-2.pdf [file NIHMS1838546-supplement-2.pdf]

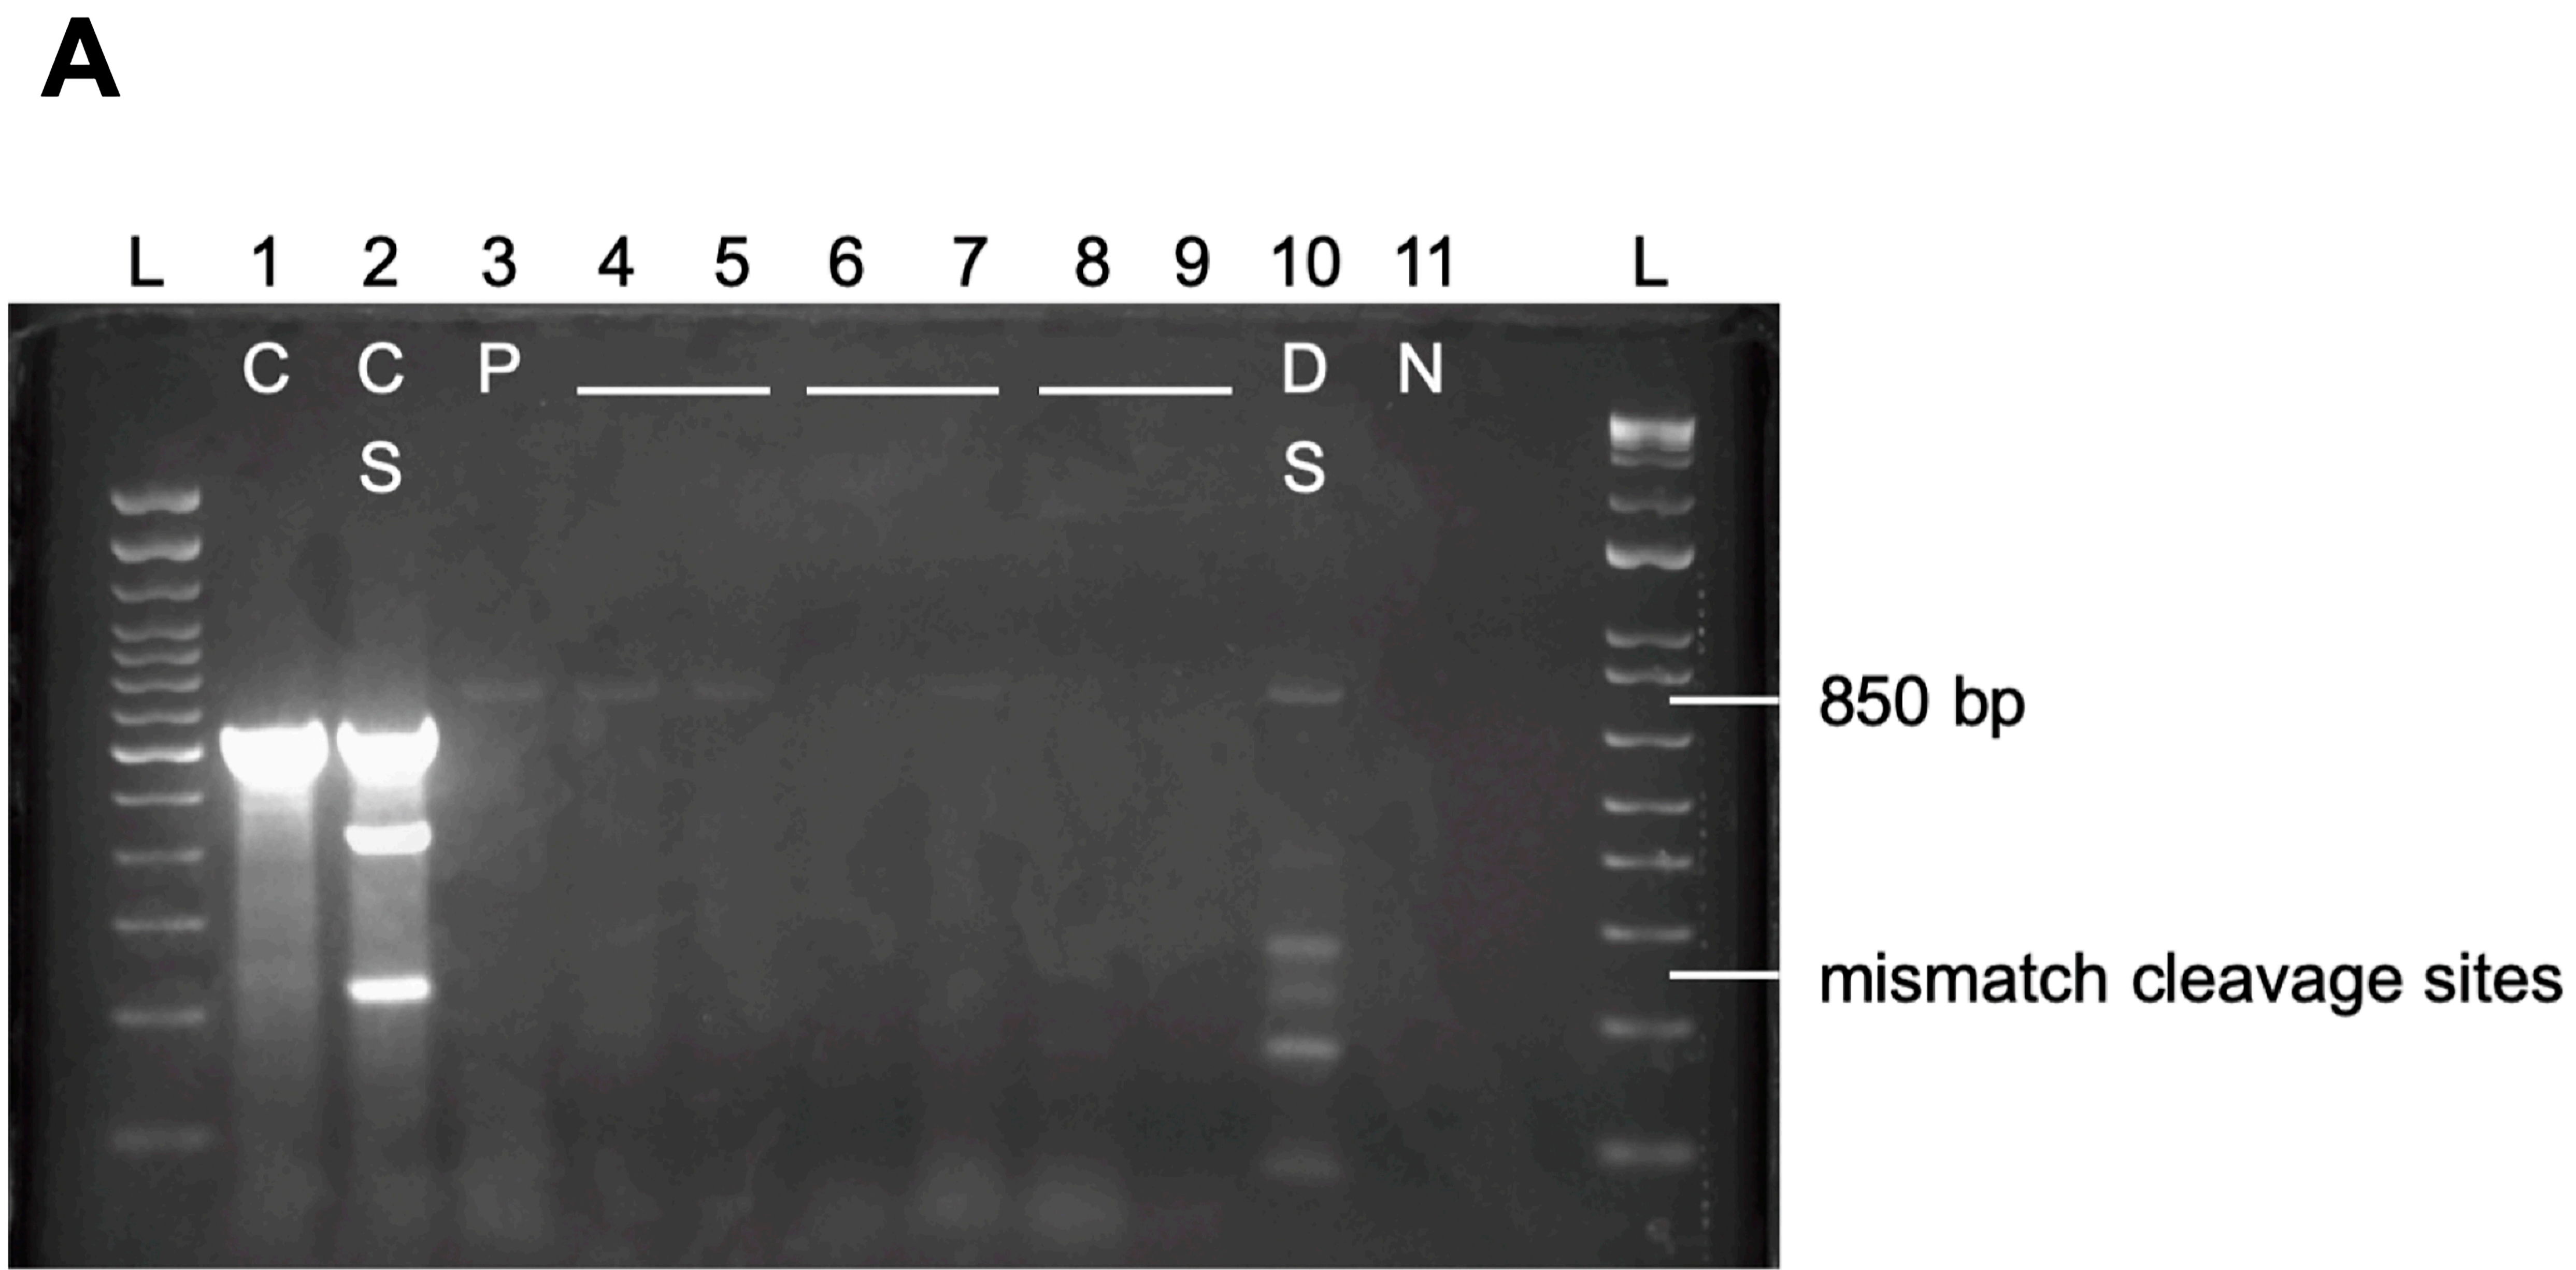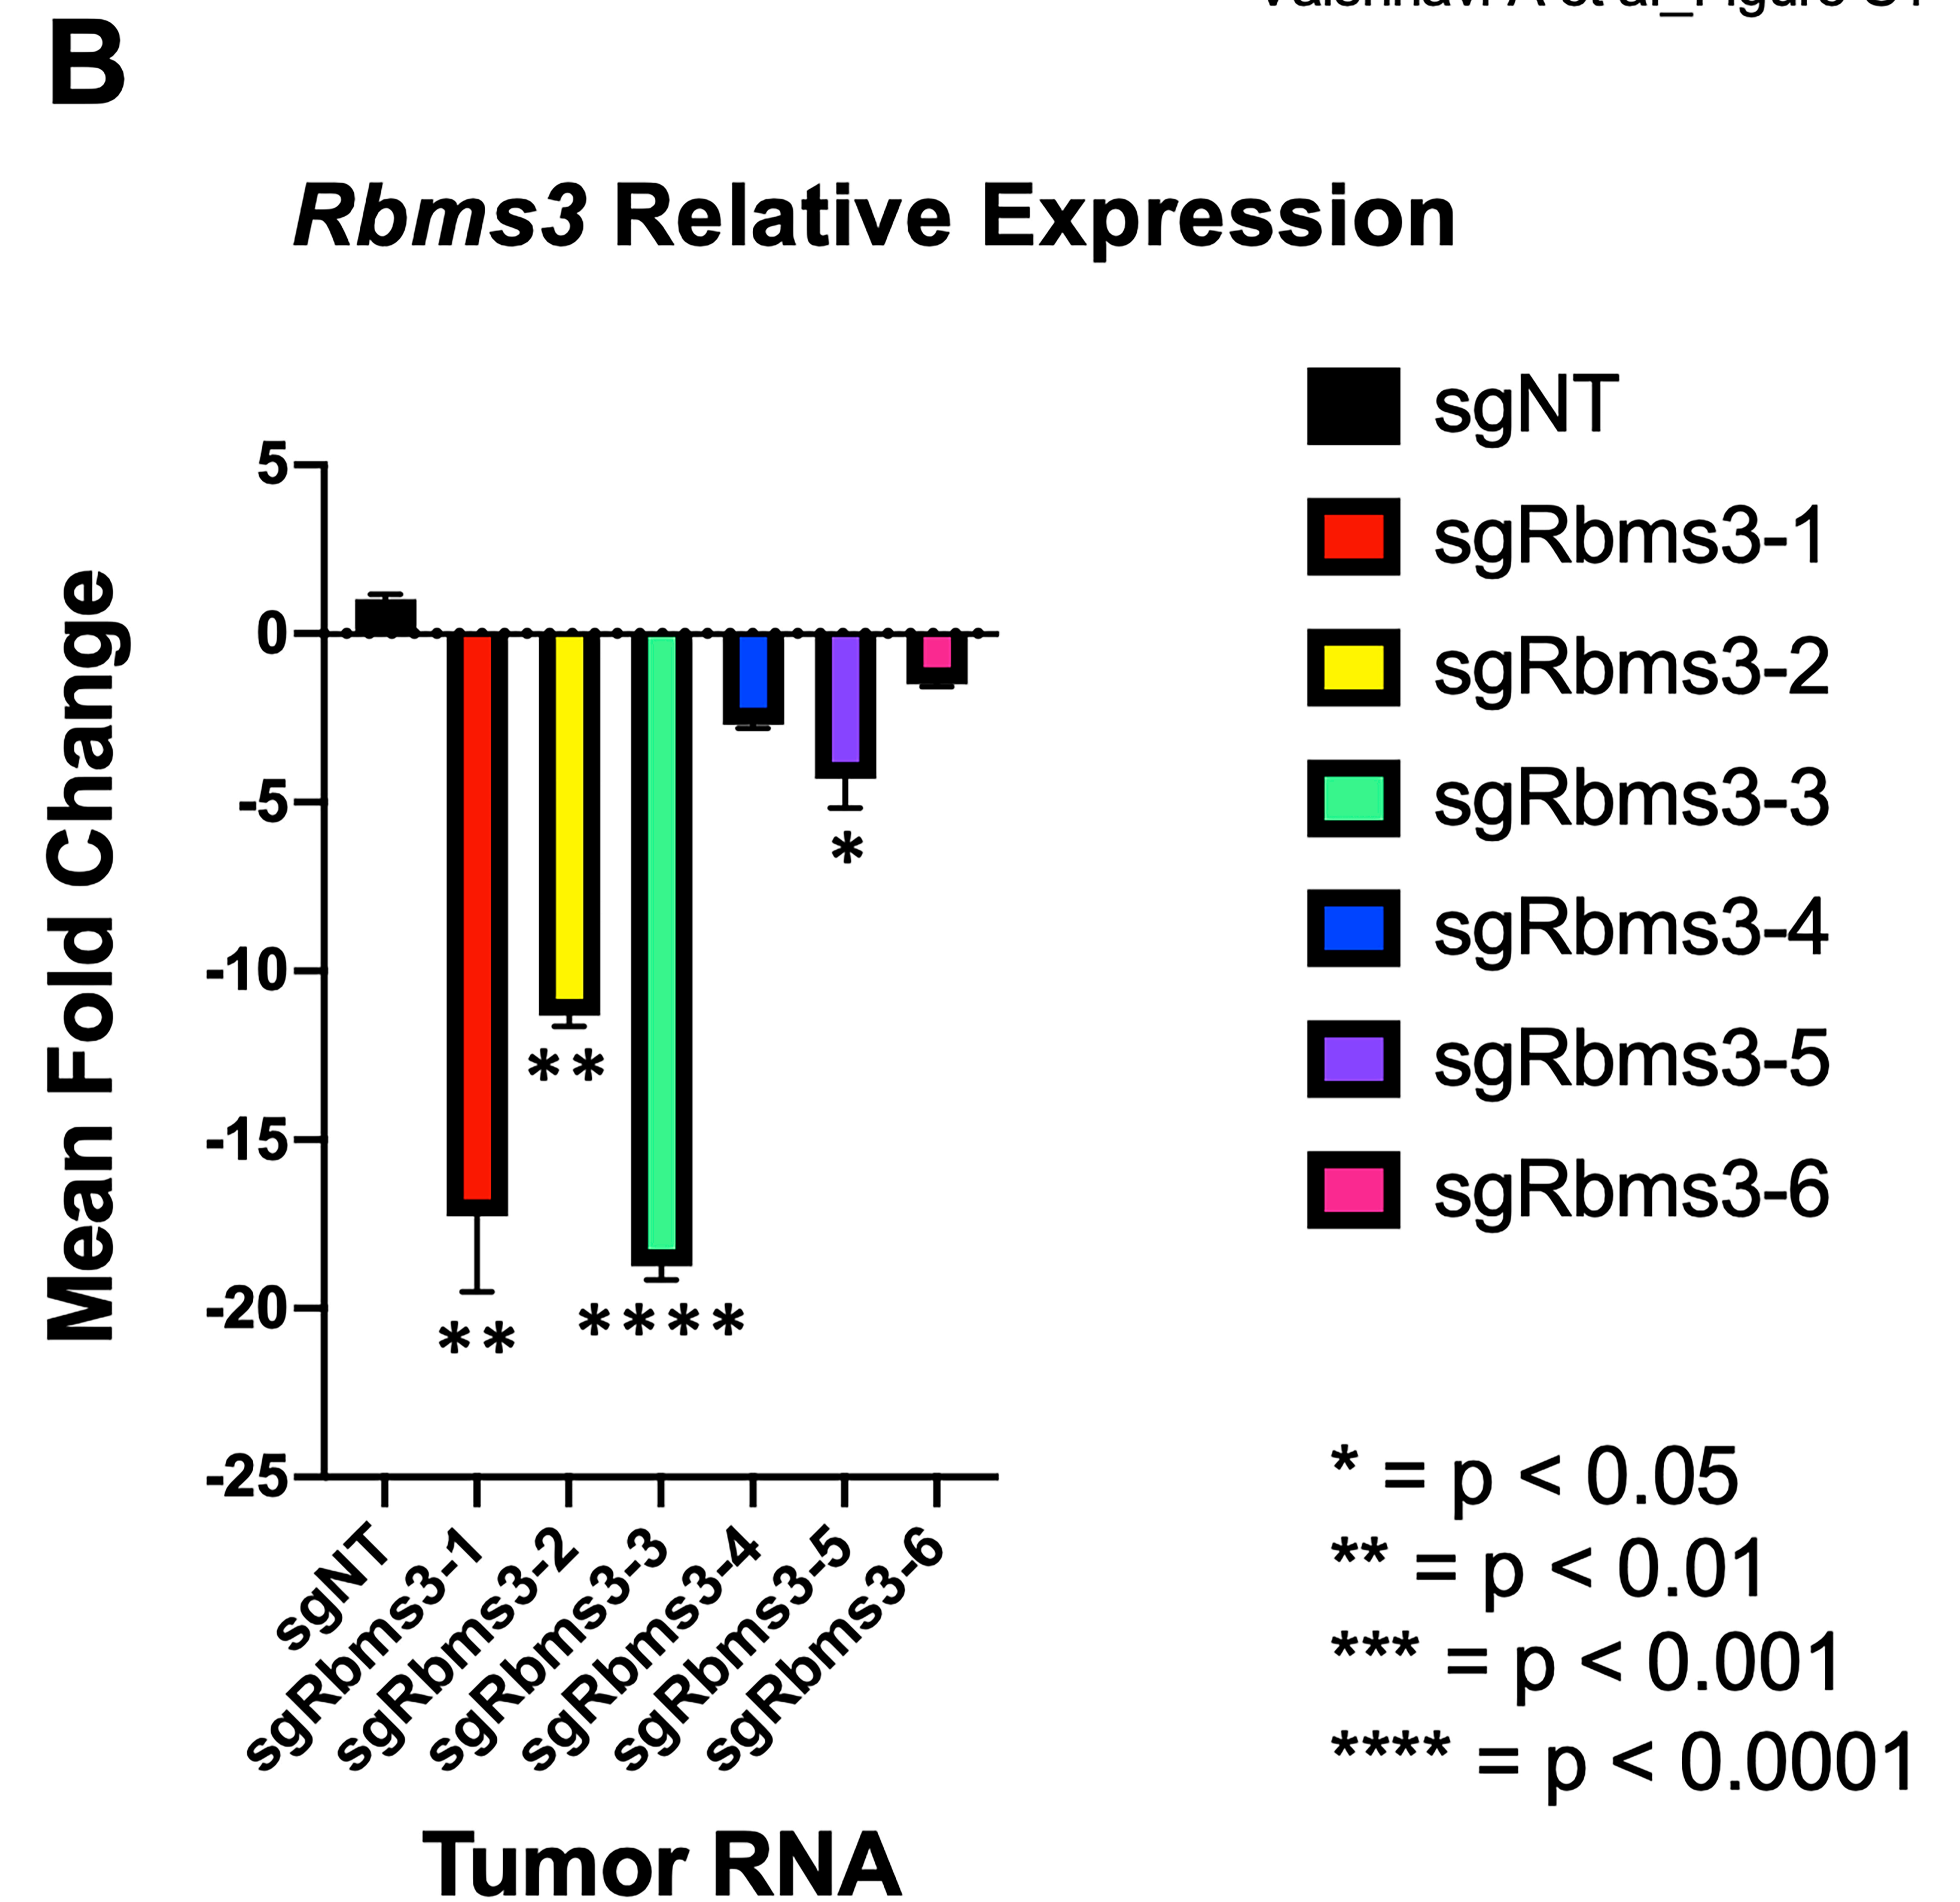

Supplementary Figure 1: Analysis of CRISPR/CAS9-mediated editing of *Rbms3* in lung tumors initiated in *BC* mice.
