# Supplementary material
Source: PubMed Central journal article supplement (PMC9797349)
Supplement: NIHMS1838546-supplement-3.pdf [file NIHMS1838546-supplement-3.pdf]

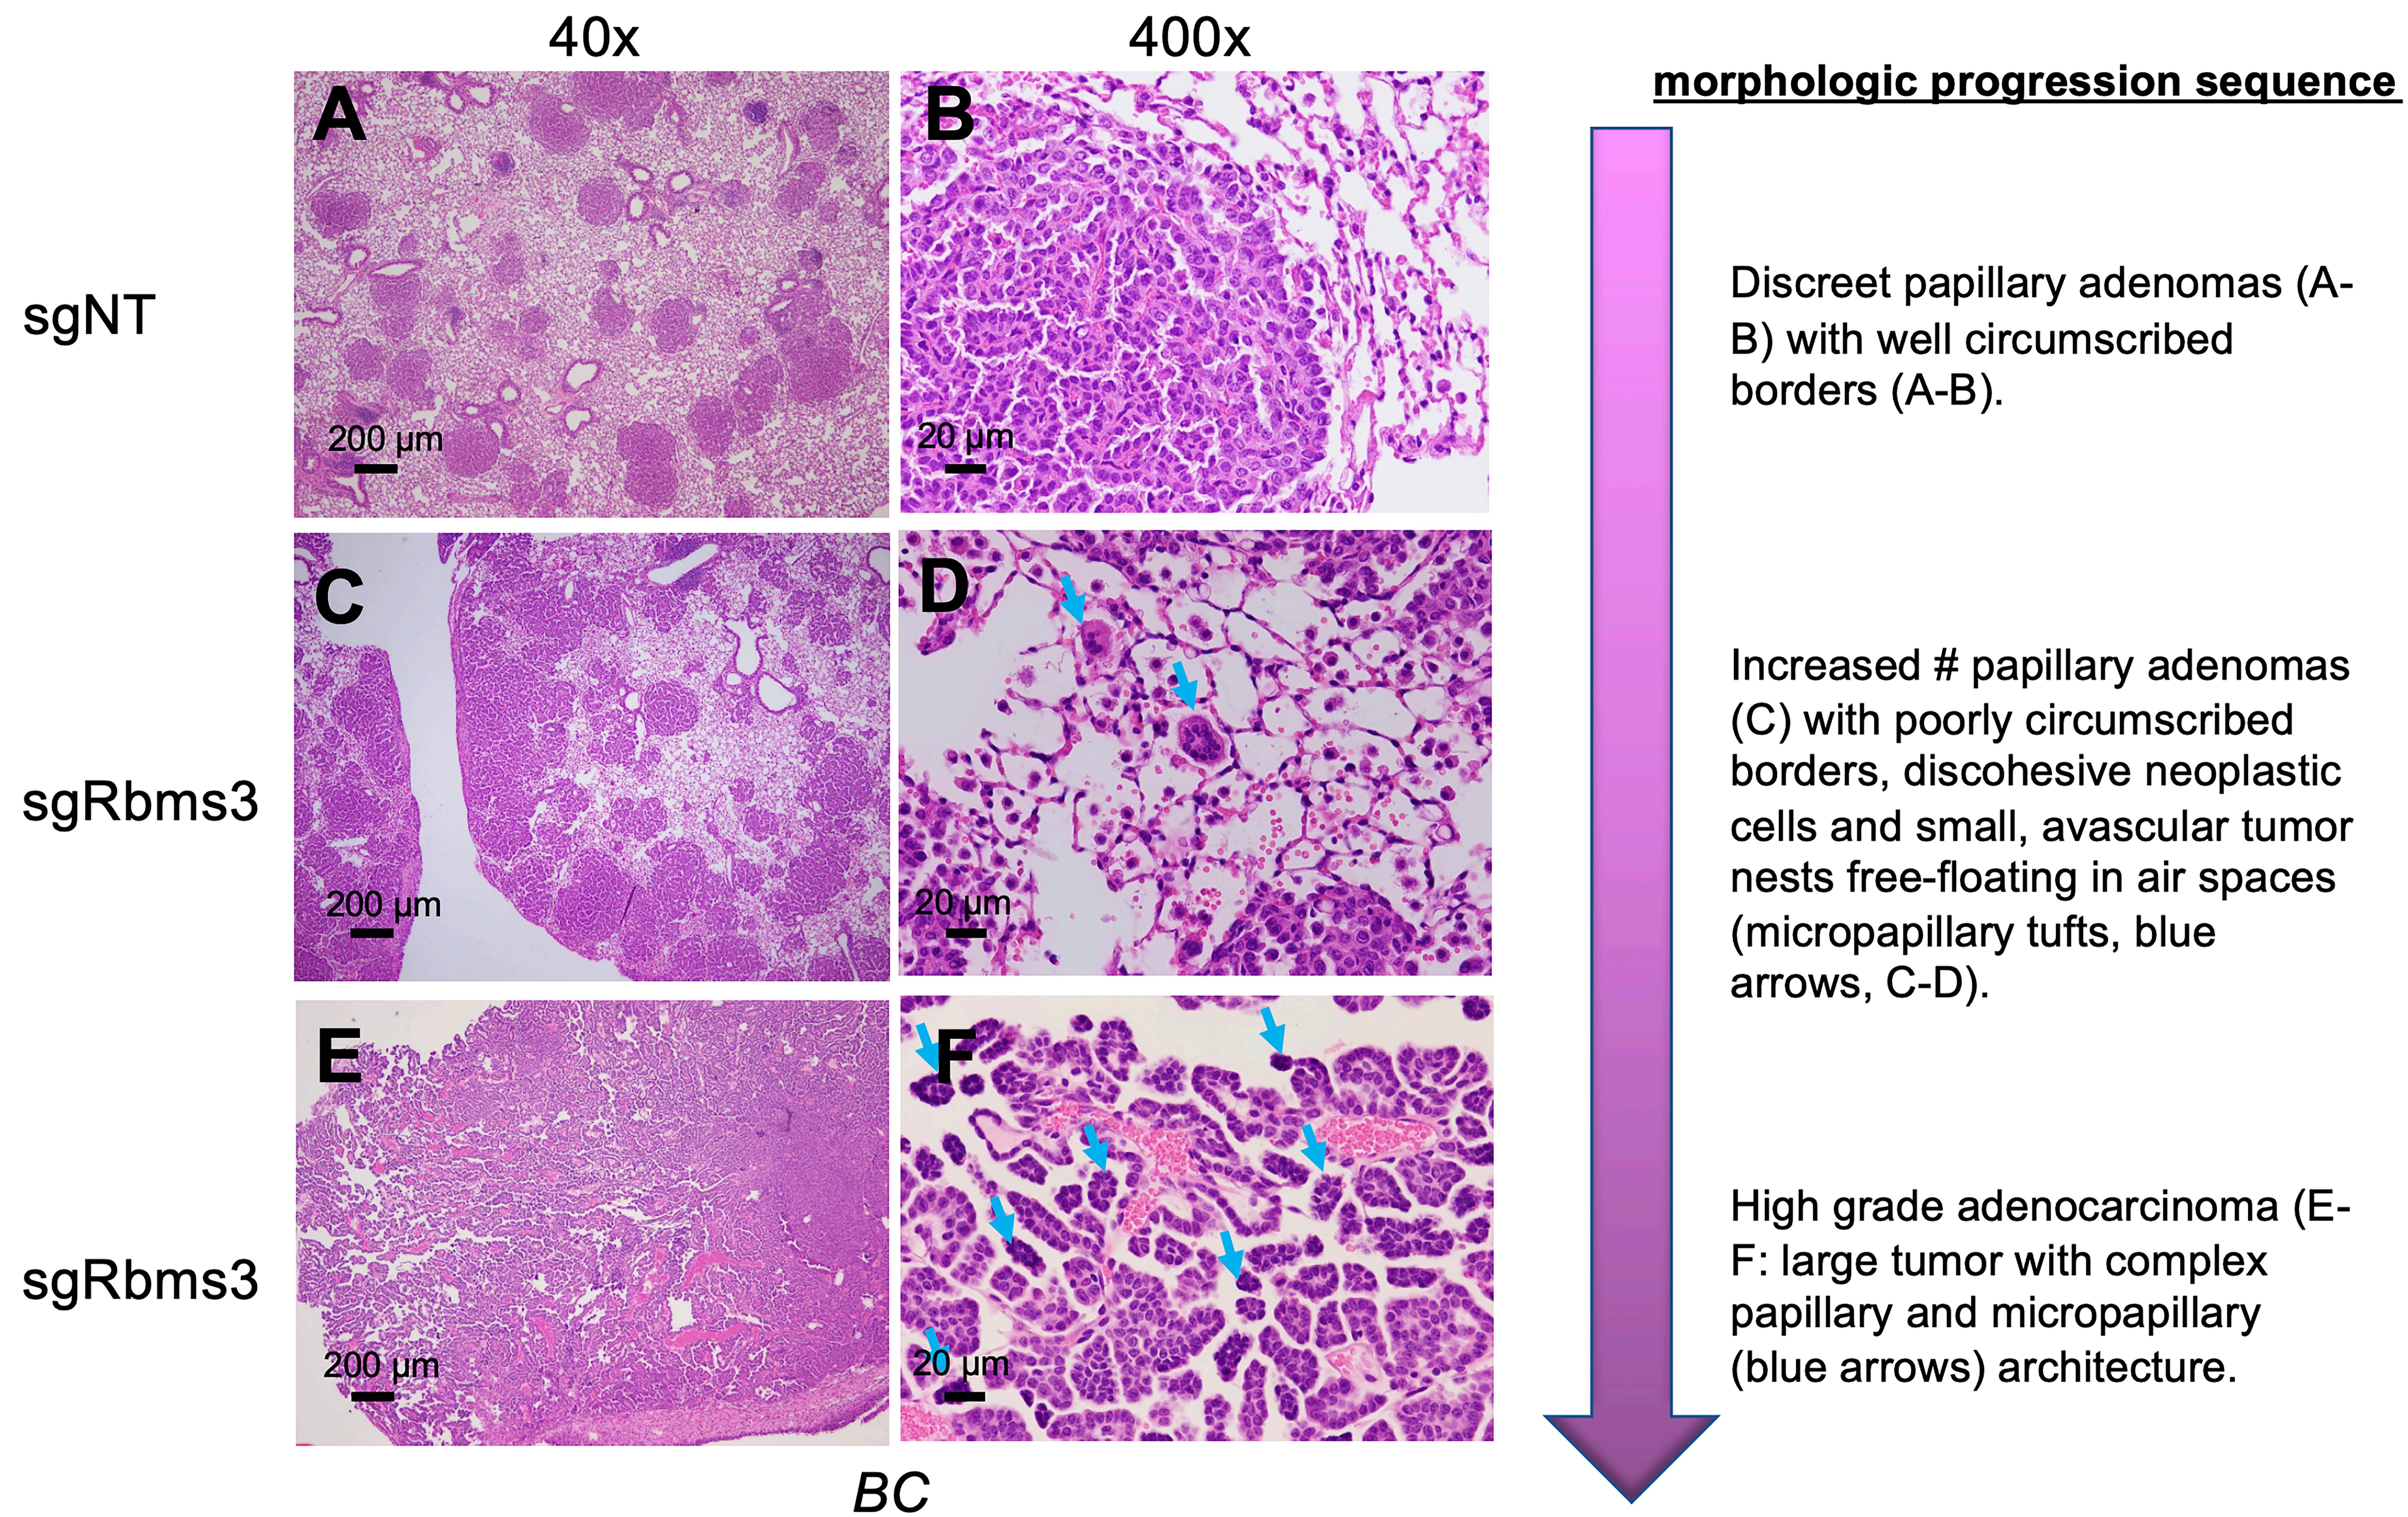

Supplementary Figure 2: Histological analyses of the grade of lung tumors in *BC* mice either with or without *Rbms3* editing.
