# Supplementary material
Source: PubMed Central journal article supplement (PMC9797349)
Supplement: NIHMS1838546-supplement-4.pdf [file NIHMS1838546-supplement-4.pdf]

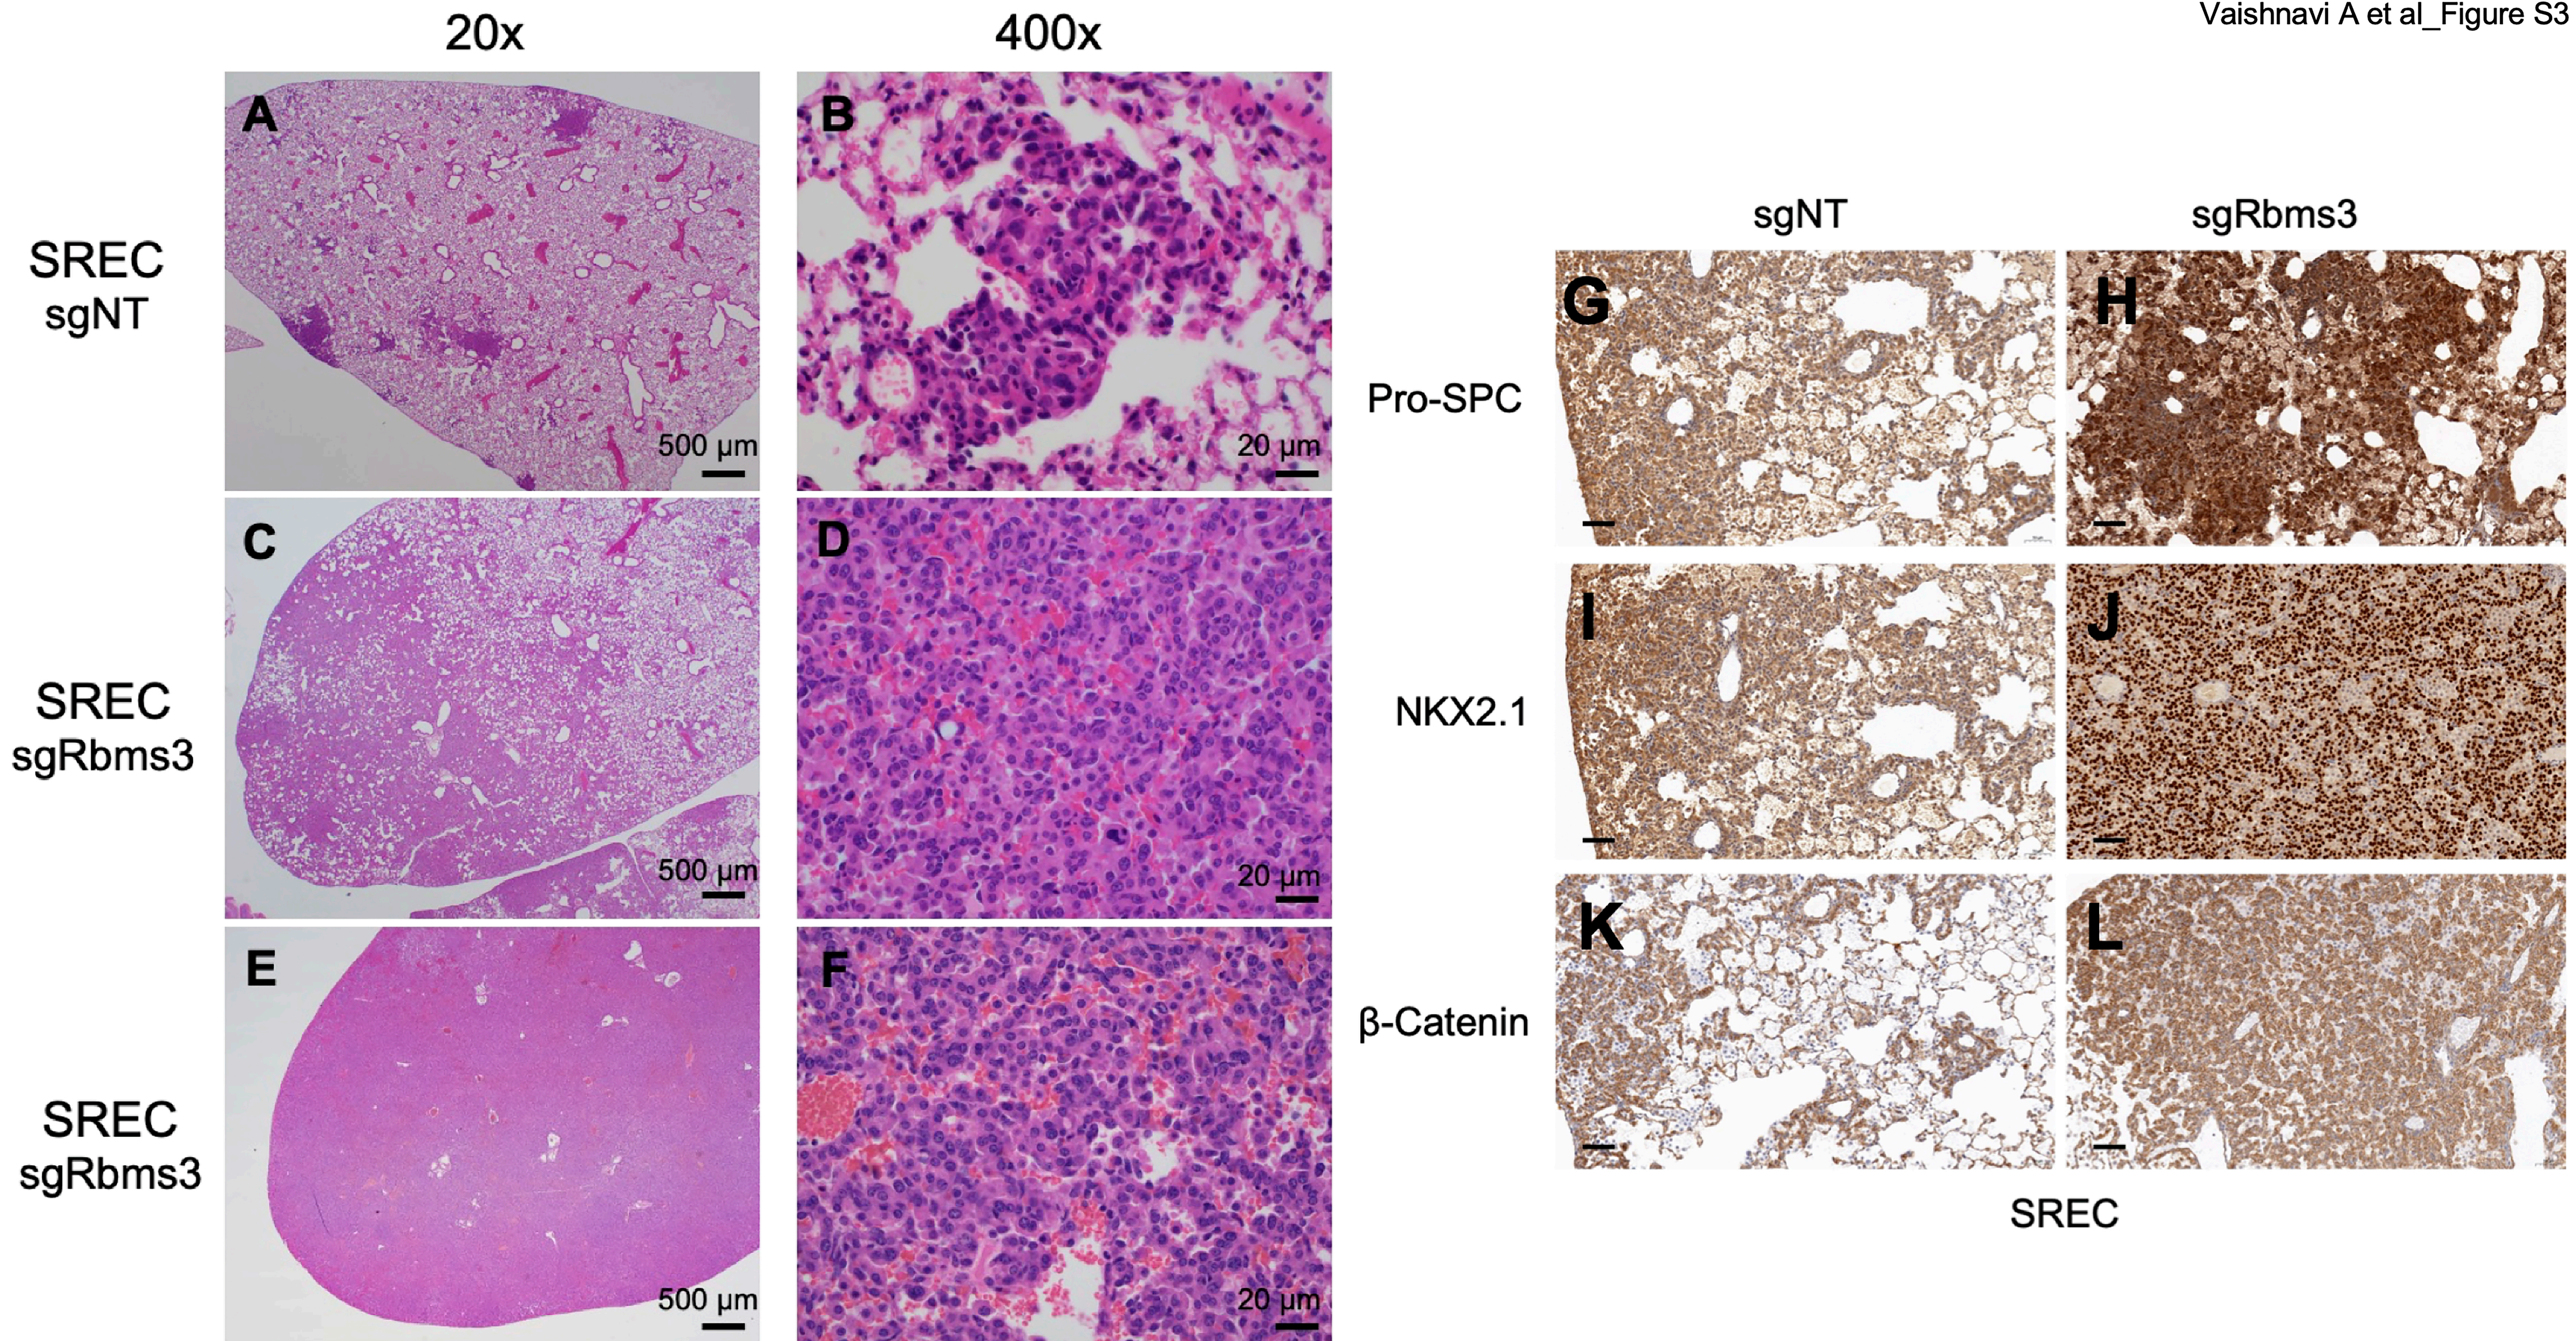

Supplemental Figure 3: EGFR<sup>L858R</sup> combined with RBMS3 loss leads to diffuse replacement of lung parenchyma with well-differentiated adenocarcinoma.
