# Supplementary material
Source: PubMed Central journal article supplement (PMC9797349)
Supplement: NIHMS1838546-supplement-5.pdf [file NIHMS1838546-supplement-5.pdf]

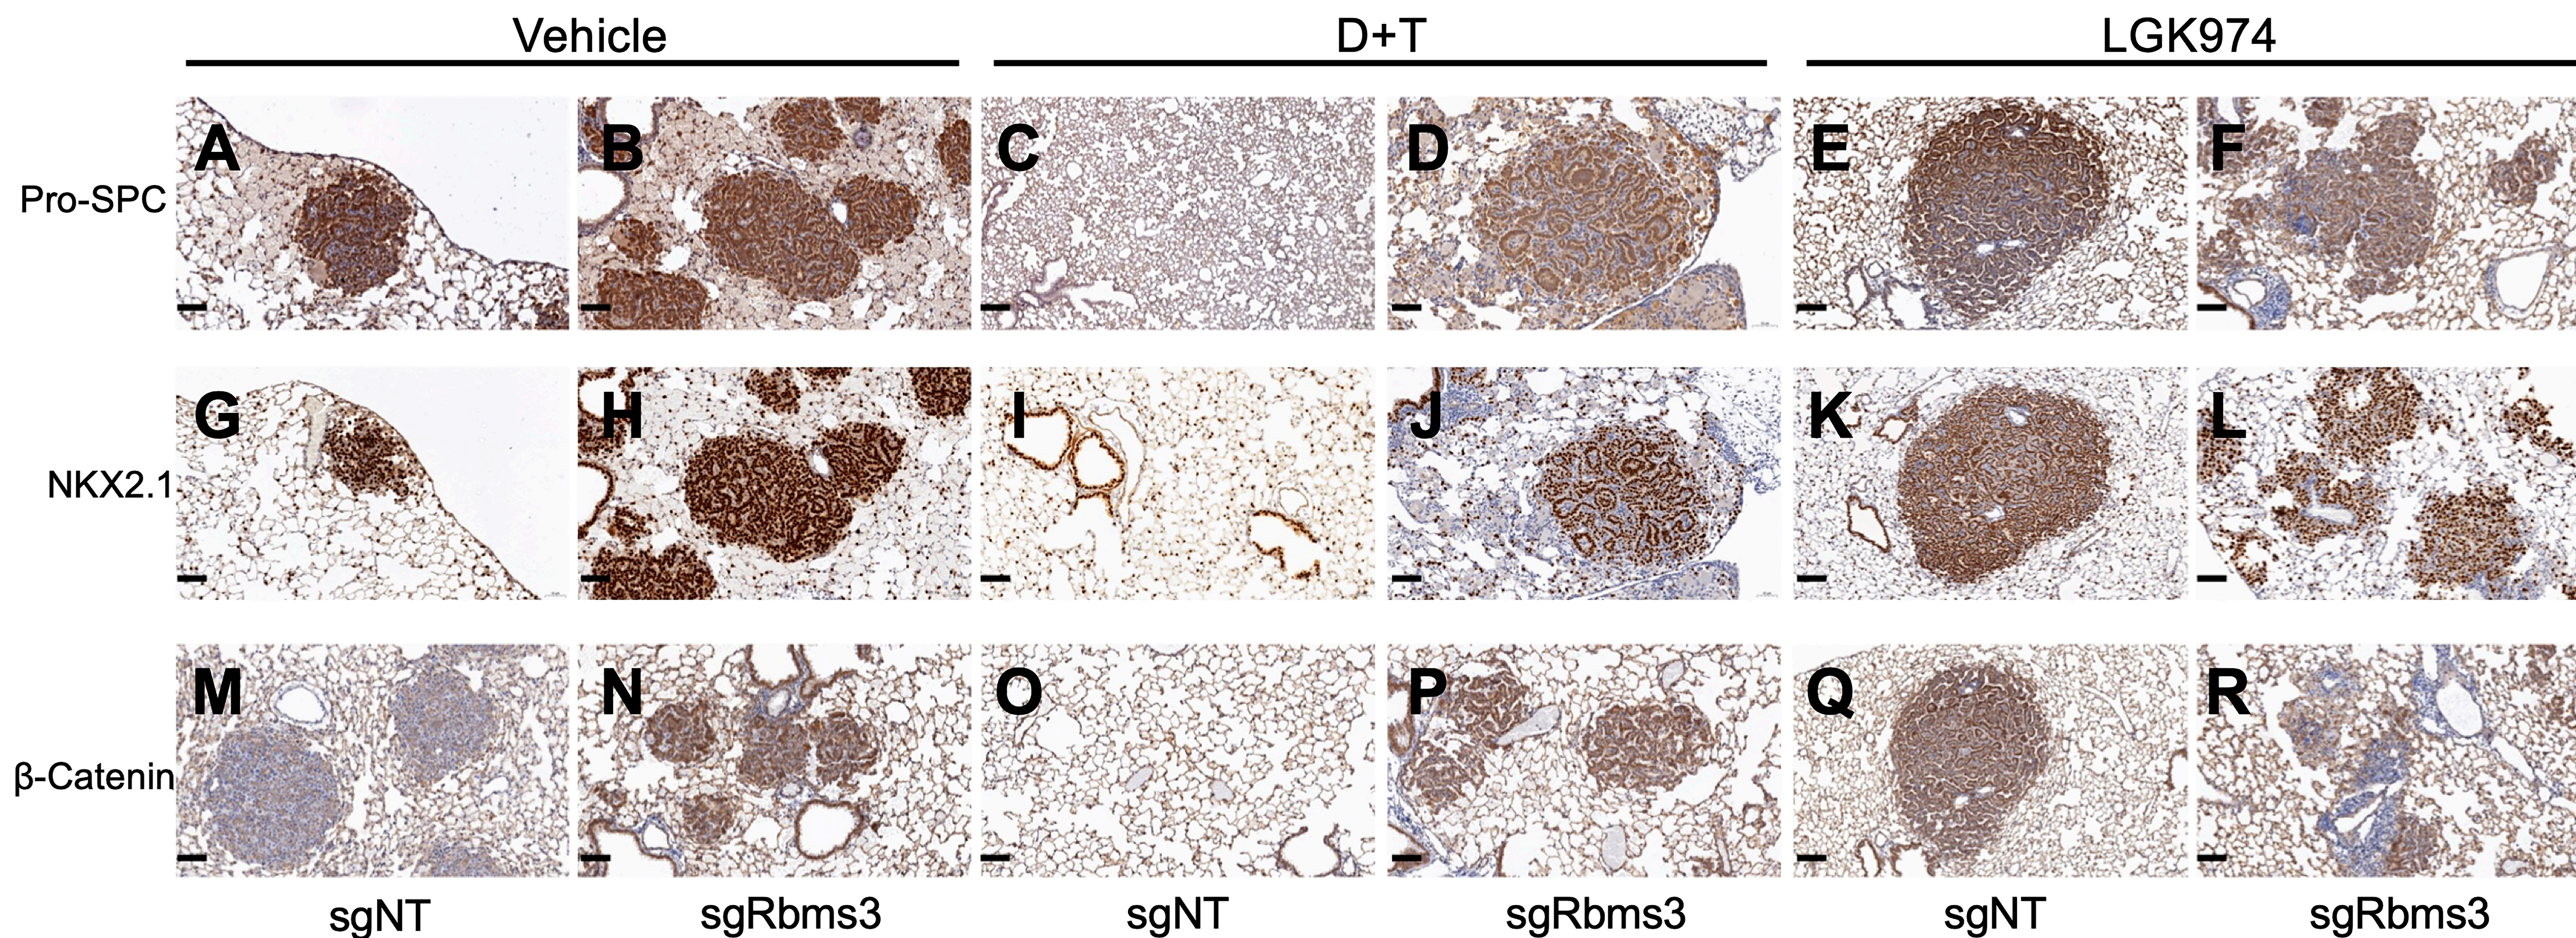

Supplemental Figure 4: Lung tumors in BC mice, with and without *Rbms3* editing, retain alveolar identity after pathway-targeted inhibition of BRAF<sup>V600E</sup> or WNT signaling.
