# Supplementary material
Source: PubMed Central journal article supplement (PMC9797349)

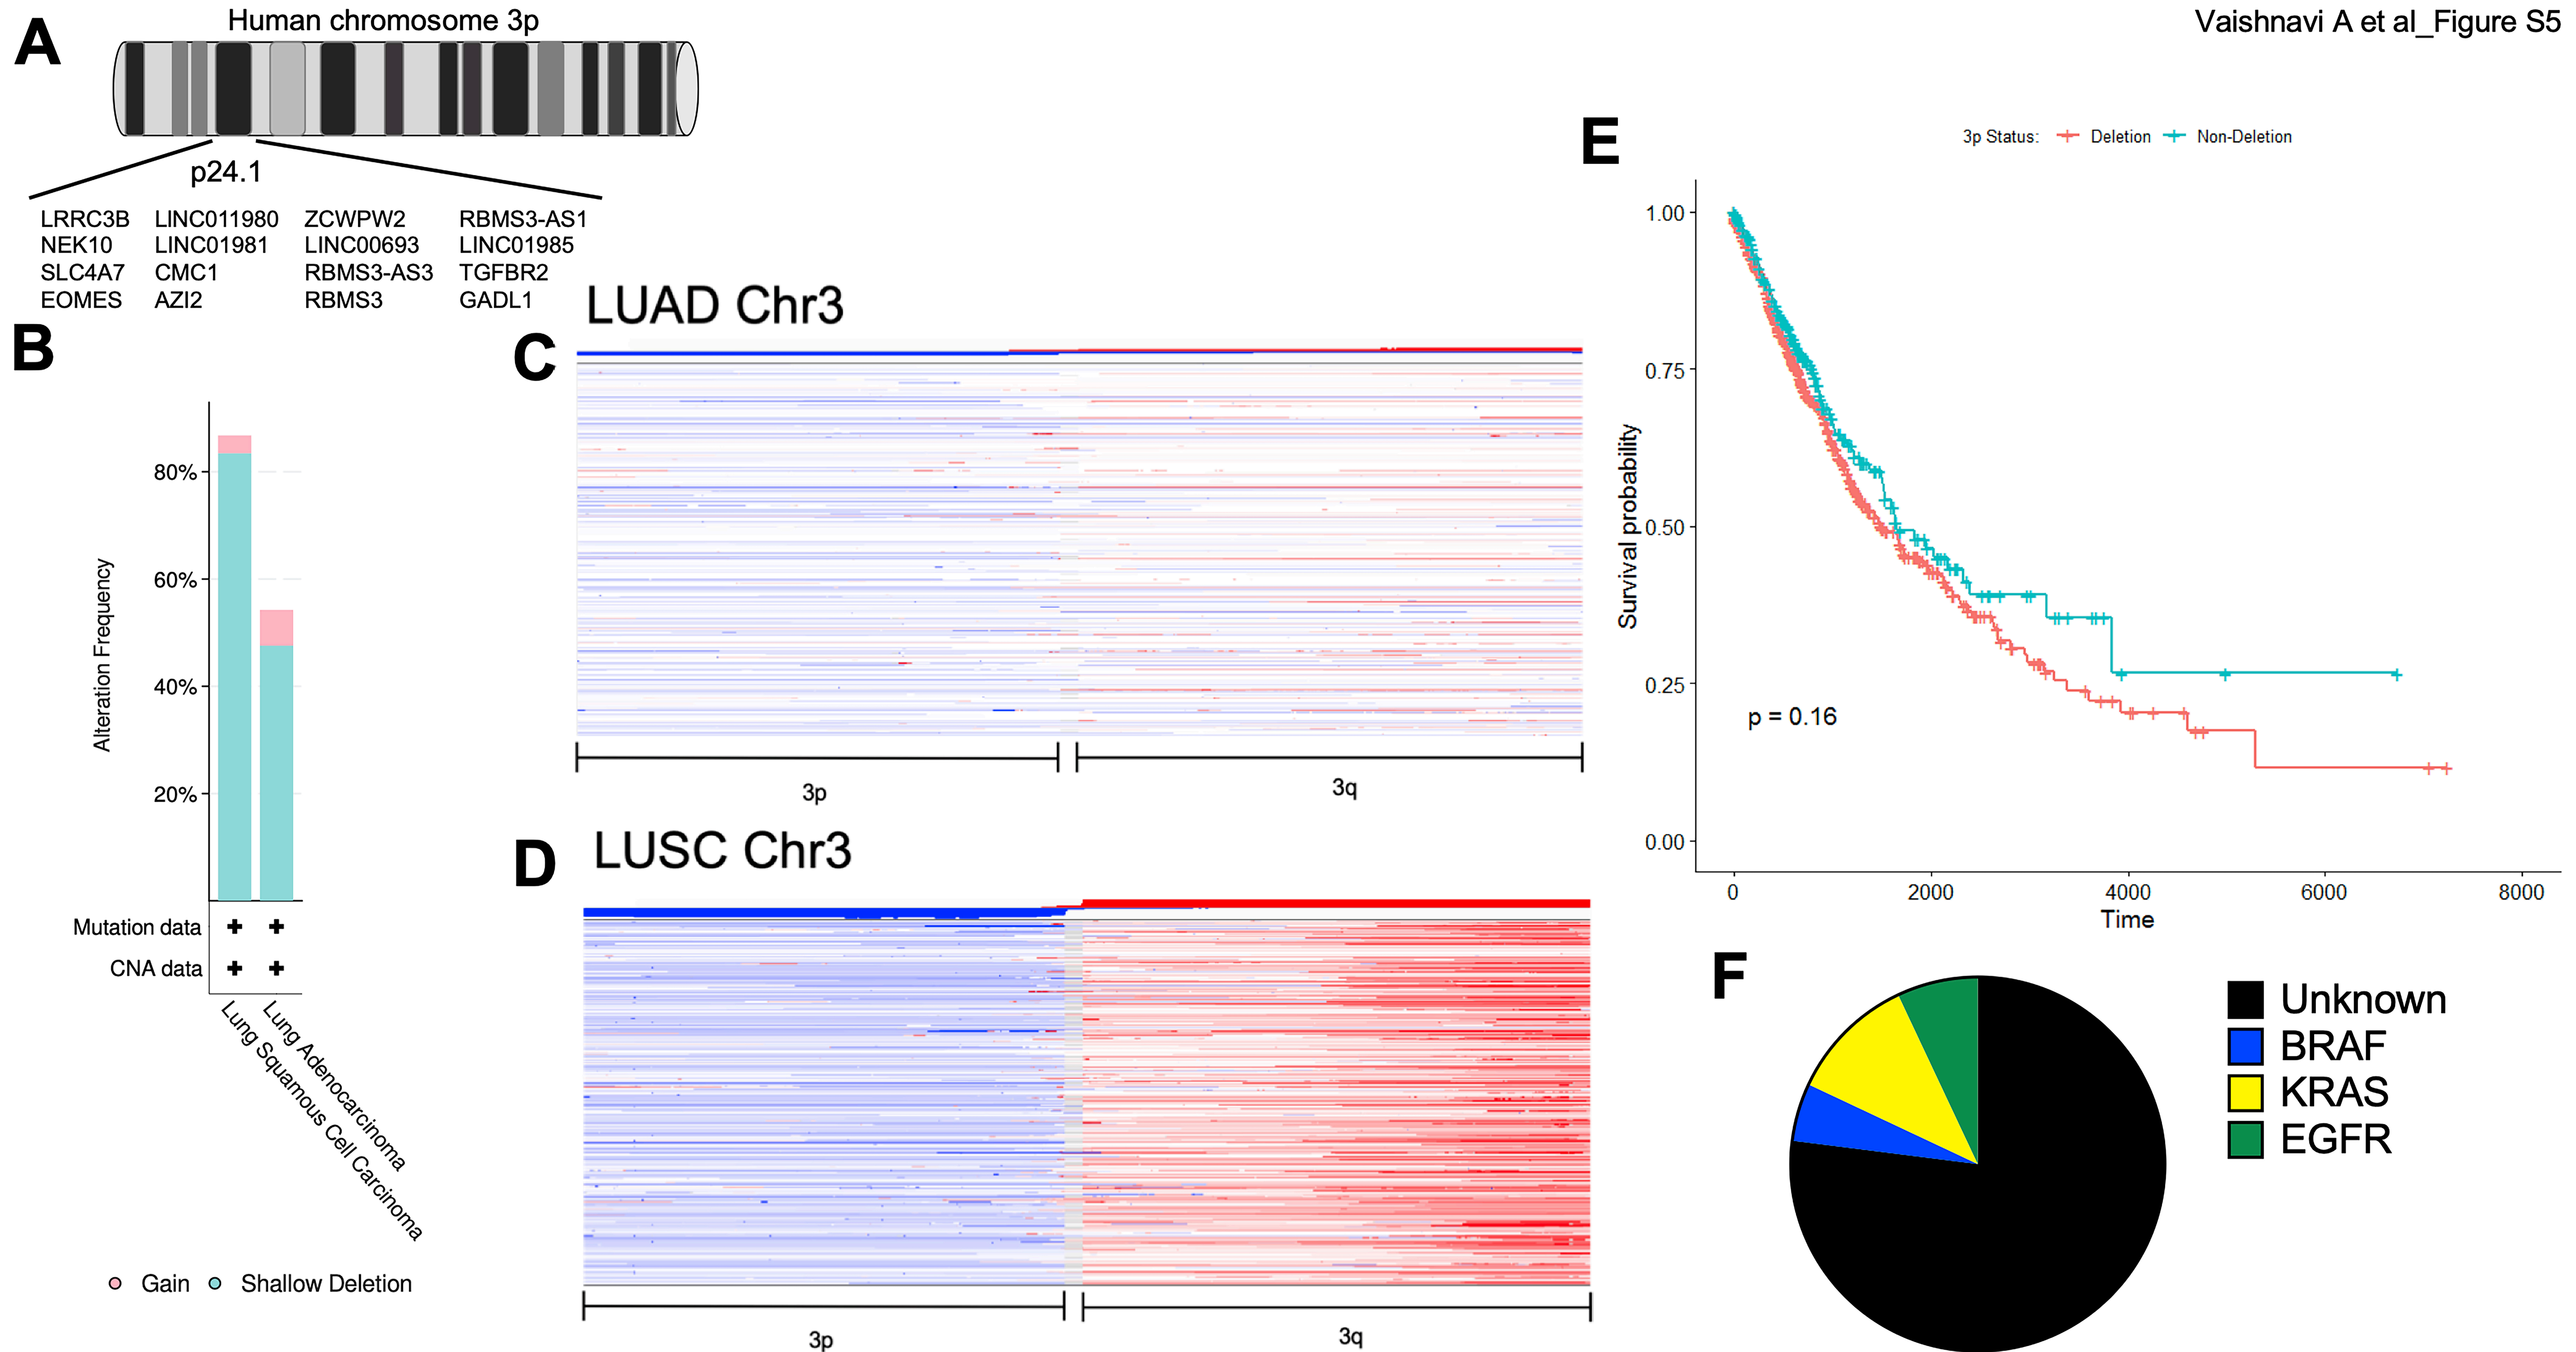

Supplementary Figure 5: *RBMS3* is lost frequently in human non-small cell lung cancer patients.

Supplement: NIHMS1838546-supplement-6.pdf [file NIHMS1838546-supplement-6.pdf]
